# Supplementary material
Source: Springer Nature journal article supplement (https://www.springermedizin.de/resource/supplementary/12889_2006_774_MOESM2_ESM.pdf/9501740)

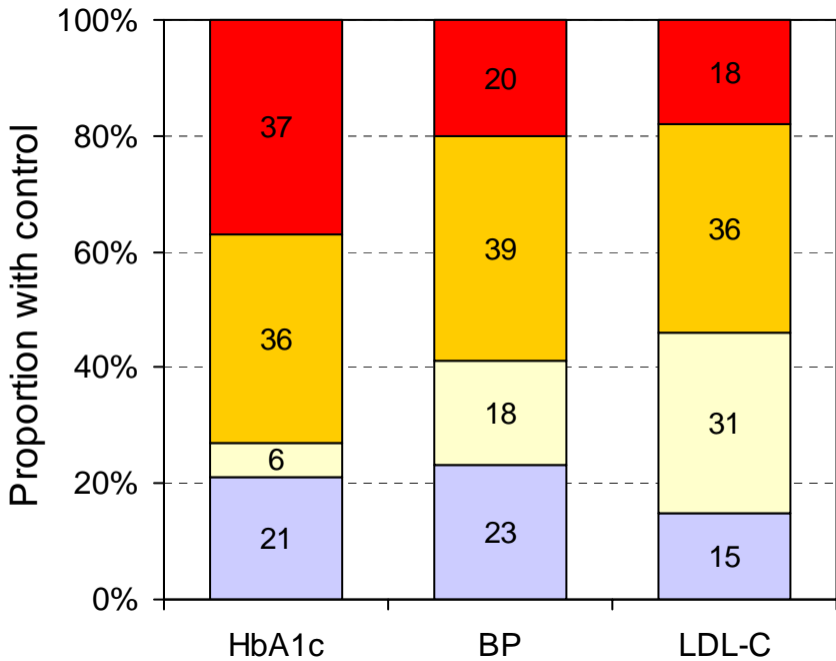

Supplement: MOESM2 [file 9501740]
